# Supplementary material for: Circ-AKT3 inhibits clear cell renal cell carcinoma metastasis via altering miR-296-3p/E-cadherin signals
Source: PubMed Central journal article supplement (PMC6824104; doi:10.1186/s12943-019-1072-5), 2019-11-01

A

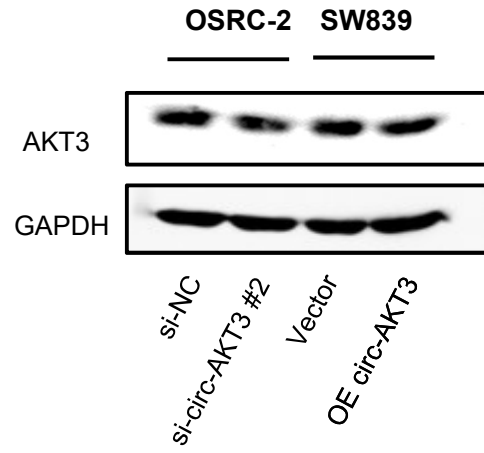

Supplement: 12943_2019_1072_MOESM2_ESM.pdf [file 12943_2019_1072_MOESM2_ESM.pdf]
